# Supplementary material for: A fluorescence detection method for the determination of β-lactoglobulin in foods
Source: Royal Society of Chemistry journal article supplement (doi:10.1039/d2ay00158f), 2022-01-01
Supplement: d2ay00158f1.pdf [file d2ay00158f1.pdf]

### Supporting Informations

Fig. S1. Fluorescence intensity of QD-aptamer ( $5 \mu\text{mol L}^{-1}$ ) before and after adding GO ( $200 \mu\text{g mL}^{-1}$ ) corresponding to different incubation times

Fig. S2. Fluorescence intensity of different GO concentrations (0, 3.125, 6.25, 12.5, 25, 50, 100, 200, 400 and  $800 \mu\text{g mL}^{-1}$ )

Fig. S3. Fluorescence intensity of different reaction systems (QD-aptamer, QD-Apt-GO, QD-Apt- $\beta$ -LG-GO) at different GO concentrations (100, 200, 400 and  $800 \mu\text{g mL}^{-1}$ )

Fig. S4. Fluorescence intensity of the QD-Apt-GO system with different incubation times (0, 10, 20 and 30 min) after adding GO ( $200 \mu\text{g mL}^{-1}$ )

Fig. S5. Fluorescence intensity of the QD-Apt- $\beta$ -LG-GO system with different incubation times (0, 10, 20 and 30 min) after adding the  $\beta$ -LG sample ( $100 \text{ mg L}^{-1}$ )

Fig. S6. Fluorescence intensity of QD-Apt-GO systems in four different molar ratios of QDs and aptamer (1:5 (■), 1:10 (●), 1:20 (▲), 1:40 (▼)) at five  $\beta$ -LG concentrations (0.78, 1.625, 6.25, 25 and  $100 \text{ mg L}^{-1}$ )

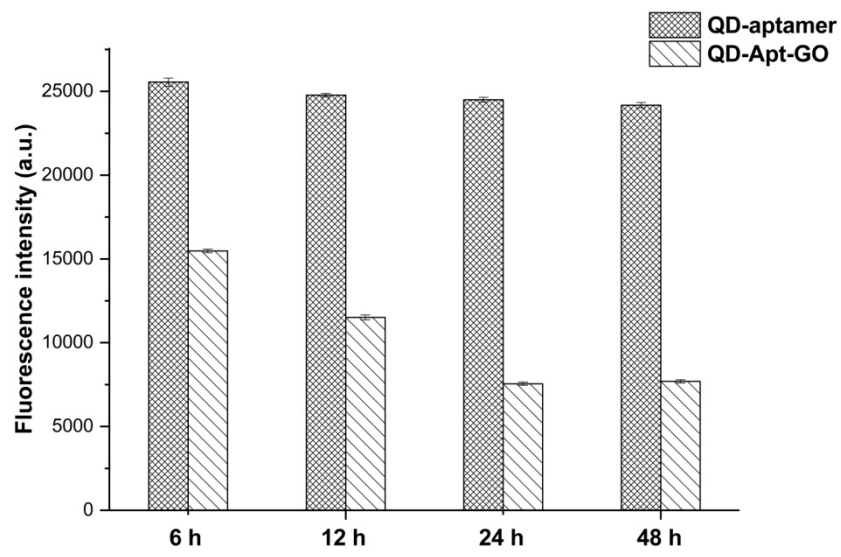

Fig. S1 Fluorescence intensity of QD-aptamer ( $5 \mu\text{mol L}^{-1}$ ) before and after adding GO ( $200 \mu\text{g mL}^{-1}$ ) corresponding to different incubation times

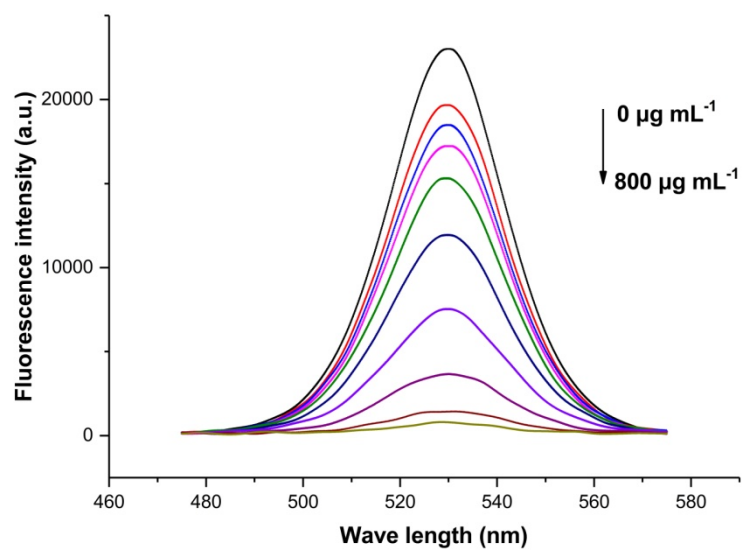

Fig. S2 Fluorescence intensity of different GO concentrations (0, 3.125, 6.25, 12.5, 25, 50, 100, 200, 400 and 800  $\mu\text{g mL}^{-1}$ )

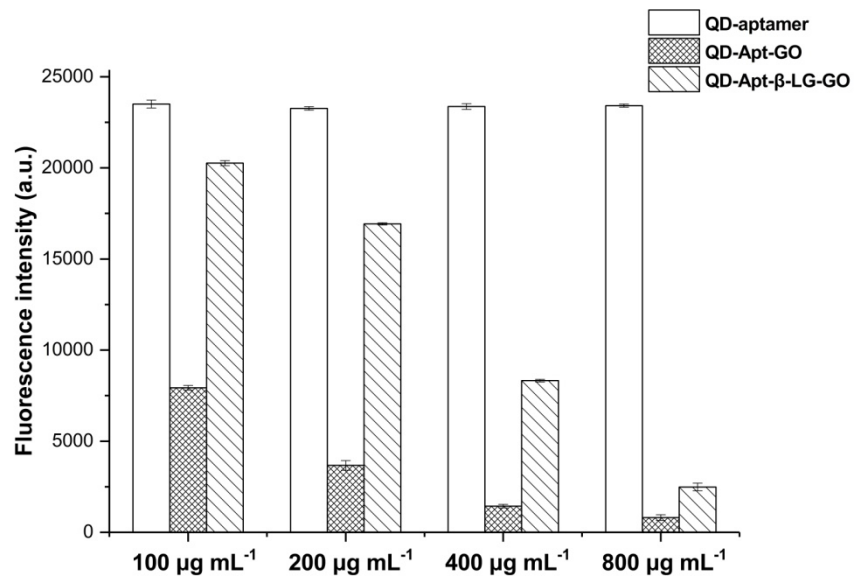

Fig. S3 Fluorescence intensity of different reaction systems (QD-aptamer, QD-Apt-GO, QD-Apt- $\beta$ -LG-GO) at different GO concentrations (100, 200, 400 and 800  $\mu\text{g mL}^{-1}$ )

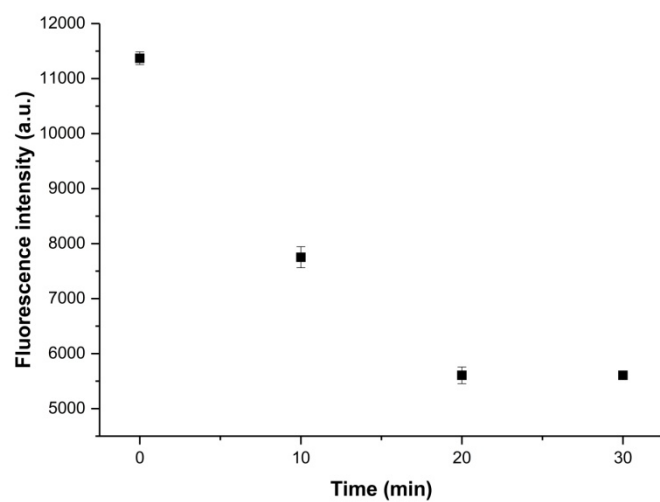

Fig. S4 Fluorescence intensity of the QD-Apt-GO system with different incubation times (0, 10, 20 and 30 min) after adding GO ( $200 \mu\text{g mL}^{-1}$ )

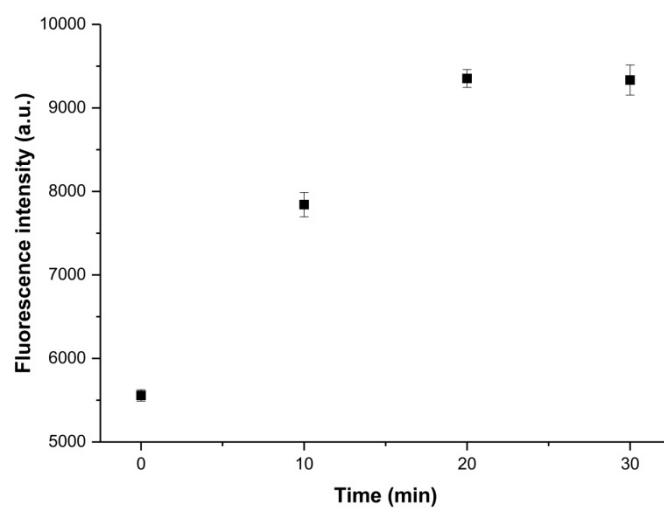

Fig. S5 Fluorescence intensity of the QD-Apt- $\beta$ -LG-GO system with different incubation times (0, 10, 20 and 30 min) after adding the  $\beta$ -LG sample ( $100 \text{ mg L}^{-1}$ )

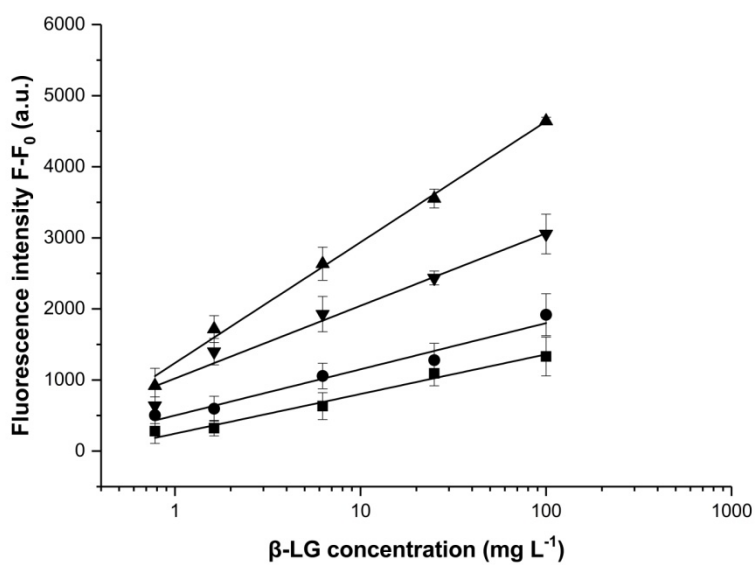

Fig. S6 Fluorescence intensity of QD-Apt-GO systems in four different molar ratios of QDs and aptamer (1:5 (■), 1:10 (●), 1:20 (▲), 1:40 (▼)) at five  $\beta$ -LG concentrations (0.78, 1.625, 6.25, 25 and 100  $\text{mg L}^{-1}$ )
